# Supplementary material for: Data-driven Design of Electrolyte Additives for High-Performance 5 V LiNi0.5Mn1.5O4 Cathodes
Source: Research Square preprint supplement (doi:10.21203/rs.3.rs-4420883/v1), 2024-05-30
Supplement: Supplementary file 1 [file 2a7dec1d03f75de48aa62f8d.xlsx]

## Sheet: Sheet1
Name	SMILES1	SMILES2	O_1	C_3_inRing	O_2_inRing	B[-1]_4_inRing	F_1	Li[+1]	C_2_inRing	B_3_inRing	C_1	C_2	N_2_inRing	N_3_inRing	C_3	O[-1]_1	S_4_inRing	P[-1]_4	Si_4	O_2	P_3	P[-1]_6_inRing	P_4	C_4	S_4	N_2
LiDFOB_1+LDF_1	O=C1O[B-](F)(OC1=O)F.[Li+]	O=[P-](F)(F)=O.[Li+]	16	8	8	4	16	8	0	0	0	0	0	0	0	0	0	4	0	0	0	0	0	0	0	0
VC_1+LDF_1	O=C1OC=CO1	O=[P-](F)(F)=O.[Li+]	12	4	8	0	8	4	8	0	0	0	0	0	0	0	0	4	0	0	0	0	0	0	0	0
PBE_1+LDF_1	C1(B2OCCCO2)=CC=CC=C1	O=[P-](F)(F)=O.[Li+]	8	4	8	0	8	4	32	4	0	0	0	0	0	0	0	4	0	0	0	0	0	0	0	0
tVCBO_0.25+LDF_1	C=CB1OB(C=C)OB(C=C)O1.C2=CC=CC=N2	O=[P-](F)(F)=O.[Li+]	8	0	3	0	8	4	5	3	3	3	1	0	0	0	0	4	0	0	0	0	0	0	0	0
LiDFOB_1+MS_1	O=C1O[B-](F)(OC1=O)F.[Li+]	O=C1CC(O[P-](F)(F)(F)(F)O1)=O.[Li+]	16	16	16	4	24	8	4	0	0	0	0	0	0	0	0	0	0	0	0	4	0	0	0	0
VC_1+MS_1	O=C1OC=CO1	O=C1CC(O[P-](F)(F)(F)(F)O1)=O.[Li+]	12	12	16	0	16	4	12	0	0	0	0	0	0	0	0	0	0	0	0	4	0	0	0	0
PBE_1+MS_1	C1(B2OCCCO2)=CC=CC=C1	O=C1CC(O[P-](F)(F)(F)(F)O1)=O.[Li+]	8	12	16	0	16	4	36	4	0	0	0	0	0	0	0	0	0	0	0	4	0	0	0	0
tVCBO_0.25+MS_1	C=CB1OB(C=C)OB(C=C)O1.C2=CC=CC=N2	O=C1CC(O[P-](F)(F)(F)(F)O1)=O.[Li+]	8	8	11	0	16	4	9	3	3	3	1	0	0	0	0	0	0	0	0	4	0	0	0	0
LiDFOB_1+TMSPi_1	O=C1O[B-](F)(OC1=O)F.[Li+]	C[Si](C)(C)OP(O[Si](C)(C)C)O[Si](C)(C)C	8	8	8	4	8	4	0	0	36	0	0	0	0	0	0	0	12	12	4	0	0	0	0	0
VC_1+TMSPi_1	O=C1OC=CO1	C[Si](C)(C)OP(O[Si](C)(C)C)O[Si](C)(C)C	4	4	8	0	0	0	8	0	36	0	0	0	0	0	0	0	12	12	4	0	0	0	0	0
PBE_1+TMSPi_1	C1(B2OCCCO2)=CC=CC=C1	C[Si](C)(C)OP(O[Si](C)(C)C)O[Si](C)(C)C	0	4	8	0	0	0	32	4	36	0	0	0	0	0	0	0	12	12	4	0	0	0	0	0
tVCBO_0.25+TMSPi_1	C=CB1OB(C=C)OB(C=C)O1.C2=CC=CC=N2	C[Si](C)(C)OP(O[Si](C)(C)C)O[Si](C)(C)C	0	0	3	0	0	0	5	3	39	3	1	0	0	0	0	0	12	12	4	0	0	0	0	0
tVCBO_0.25+None	C=CB1OB(C=C)OB(C=C)O1.C2=CC=CC=N2		0	0	3	0	0	0	5	3	3	3	1	0	0	0	0	0	0	0	0	0	0	0	0	0
LiDFOB_1+None	O=C1O[B-](F)(OC1=O)F.[Li+]		8	8	8	4	8	4	0	0	0	0	0	0	0	0	0	0	0	0	0	0	0	0	0	0
TMSPi_2		C[Si](C)(C)OP(O[Si](C)(C)C)O[Si](C)(C)C	0	0	0	0	0	0	0	0	72	0	0	0	0	0	0	0	24	24	8	0	0	0	0	0
PTSI_0.5		CC1=CC=C(S(=O)(N=C=O)=O)C=C1	6	4	0	0	0	0	8	0	2	2	0	0	0	0	0	0	0	0	0	0	0	0	2	2
DEPP_2		CCOP(OCC)C1=CC=CC=C1	0	8	0	0	0	0	40	0	16	16	0	0	0	0	0	0	0	16	8	0	0	0	0	0
DPDMS_1		CO[Si](C1=CC=CC=C1)(OC)C2=CC=CC=C2	0	8	0	0	0	0	40	0	8	0	0	0	0	0	0	0	4	8	0	0	0	0	0	0
SA_3		O=C1OC(CC1)=O	24	24	12	0	0	0	24	0	0	0	0	0	0	0	0	0	0	0	0	0	0	0	0	0
TPP_10		O=P(OC1=CC=CC=C1)(OC2=CC=CC=C2)OC3=CC=CC=C3	40	120	0	0	0	0	600	0	0	0	0	0	0	0	0	0	0	120	0	0	40	0	0	0
PES_1+None	O=S1(OCC=C1)=O		8	0	4	0	0	0	12	0	0	0	0	0	0	0	4	0	0	0	0	0	0	0	0	0
None+TMSPa_1		O=P(O[Si](C)(C)C)(O[Si](C)(C)C)O[Si](C)(C)C	4	0	0	0	0	0	0	0	36	0	0	0	0	0	0	0	12	12	0	0	4	0	0	0
Li2C2O4_1+MS_1	[O-]C(C([O-])=O)=O.[Li+].[Li+]	O=C1CC(O[P-](F)(F)(F)(F)O1)=O.[Li+]	16	8	8	0	16	12	4	0	0	0	0	0	8	8	0	0	0	0	0	4	0	0	0	0
LiBOB_1+LDF_1	O=C1C(O[B-]2(OC(C(O2)=O)=O)O1)=O.[Li+]	O=[P-](F)(F)=O.[Li+]	24	16	16	4	8	8	0	0	0	0	0	0	0	0	0	4	0	0	0	0	0	0	0	0
ADM_1+LiOtC4F9_1	CN(C1)CC(OB(C=C)OC1=O)=O	[O-]C(C(F)(F)F)(C(F)(F)F)C(F)(F)F.[Li+]	8	8	8	0	36	4	8	4	8	4	0	4	0	4	0	0	0	0	0	0	0	16	0	0
LiBOB_1+LiBFEP_1	O=C1C(O[B-]2(OC(C(O2)=O)=O)O1)=O.[Li+]	[O-]P(OCC(F)(F)F)(OCC(F)(F)F)=O.[Li+]	20	16	16	4	24	8	0	0	0	8	0	0	0	4	0	0	0	8	0	0	4	8	0	0
LiDFOB_1+LiBFEP_1	O=C1O[B-](F)(OC1=O)F.[Li+]	[O-]P(OCC(F)(F)F)(OCC(F)(F)F)=O.[Li+]	12	8	8	4	32	8	0	0	0	8	0	0	0	4	0	0	0	8	0	0	4	8	0	0
ADM_1+TMSPi_1	CN(C1)CC(OB(C=C)OC1=O)=O	C[Si](C)(C)OP(O[Si](C)(C)C)O[Si](C)(C)C	8	8	8	0	0	0	8	4	44	4	0	4	0	0	0	0	12	12	4	0	0	0	0	0
