# Supplementary material for: Data-driven Design of Electrolyte Additives for High-Performance 5 V LiNi0.5Mn1.5O4 Cathodes
Source: Research Square preprint supplement (doi:10.21203/rs.3.rs-4420883/v1), 2024-05-30
Supplement: Supplementary file 2 [file 63350ca800400fff74f9bbb8.xlsx]

## Sheet: LNMO_wSingle_additive_customFea
Name	SMILES1	SMILES2	AddWeightPercent1	AddWeightPercent2	Add1Mult	Add2Mult	FinImpedance	FinImpedance_std	DeltaImpedance	DeltaImpedance_std	FinSpcCap	FinSpcCap_std
LiDFOB_1+SA_1	O=C1O[B-](F)(F)OC1=O.[Li+]	O=C1CCC(=O)O1	1	1	4	4	52	27	18	20	88	9
LiBOB_1+TMSPi_1	O=C1O[B-]2(OC1=O)OC(=O)C(=O)O2.[Li+]	C[Si](C)(C)OP(O[Si](C)(C)C)O[Si](C)(C)C	1	1	4	4	57	30	19	20	88	9
LiBOB_1+MS_1	O=C1O[B-]2(OC1=O)OC(=O)C(=O)O2.[Li+]	O=C1CC(=O)O[P-](F)(F)(F)(F)O1.[Li+]	1	1	4	4	53	28	19	21	86	10
LiBOB_1+SA_1	O=C1O[B-]2(OC1=O)OC(=O)C(=O)O2.[Li+]	O=C1CCC(=O)O1	1	1	4	4	53	28	19	20	86	10
VC_1+SA_1	O=c1occo1	O=C1CCC(=O)O1	1	1	4	4	73	24	20	20	86	9
LiBOB_1+LDF_1	O=C1O[B-]2(OC1=O)OC(=O)C(=O)O2.[Li+]	O=[P-](=O)(F)F.[Li+]	1	1	4	4	53	27	19	21	84	10
LiDFOB_1+TMSPa_1	O=C1O[B-](F)(F)OC1=O.[Li+]	C[Si](C)(C)OP(=O)(O[Si](C)(C)C)O[Si](C)(C)C	1	1	4	4	57	32	19	20	84	11
VC_1+TMSPa_1	O=c1occo1	C[Si](C)(C)OP(=O)(O[Si](C)(C)C)O[Si](C)(C)C	1	1	4	4	61	27	19	19	83	11
LiBOB_1+TMSPa_1	O=C1O[B-]2(OC1=O)OC(=O)C(=O)O2.[Li+]	C[Si](C)(C)OP(=O)(O[Si](C)(C)C)O[Si](C)(C)C	1	1	4	4	58	33	19	20	82	12
PBE_1+TMSPa_1	c1ccc(B2OCCCO2)cc1	C[Si](C)(C)OP(=O)(O[Si](C)(C)C)O[Si](C)(C)C	1	1	4	4	62	27	30	21	78	12
PBE_1+SA_1	c1ccc(B2OCCCO2)cc1	O=C1CCC(=O)O1	1	1	4	4	73	24	34	22	78	10
LiDFOB_1+DPDMS_1	O=C1O[B-](F)(F)OC1=O.[Li+]	CO[Si](OC)(c1ccccc1)c1ccccc1	1	1	4	4	52	28	34	22	77	10
LiBOB_1+DPDMS_1	O=C1O[B-]2(OC1=O)OC(=O)C(=O)O2.[Li+]	CO[Si](OC)(c1ccccc1)c1ccccc1	1	1	4	4	53	29	34	23	76	11
VC_1+DPDMS_1	O=c1occo1	CO[Si](OC)(c1ccccc1)c1ccccc1	1	1	4	4	70	24	39	24	73	11
LiDFOB_1+MPS_1	O=C1O[B-](F)(F)OC1=O.[Li+]	CS(=O)(=O)c1ccccc1	1	1	4	4	66	37	49	39	71	17
LiBOB_1+MPS_1	O=C1O[B-]2(OC1=O)OC(=O)C(=O)O2.[Li+]	CS(=O)(=O)c1ccccc1	1	1	4	4	66	37	49	39	70	17
VC_1+MPS_1	O=c1occo1	CS(=O)(=O)c1ccccc1	1	1	4	4	66	37	49	39	69	17
LiDFOB_1+DEPP_1	O=C1O[B-](F)(F)OC1=O.[Li+]	CCOP(OCC)c1ccccc1	1	1	4	4	55	32	43	32	67	17
LiBOB_1+DEPP_1	O=C1O[B-]2(OC1=O)OC(=O)C(=O)O2.[Li+]	CCOP(OCC)c1ccccc1	1	1	4	4	56	32	43	33	66	17
LiDFOB_1+TPP_1	O=C1O[B-](F)(F)OC1=O.[Li+]	O=P(Oc1ccccc1)(Oc1ccccc1)Oc1ccccc1	1	1	4	4	52	27	44	30	65	16
VC_1+DEPP_1	O=c1occo1	CCOP(OCC)c1ccccc1	1	1	4	4	90	28	46	33	65	17
LiBOB_1+TPP_1	O=C1O[B-]2(OC1=O)OC(=O)C(=O)O2.[Li+]	O=P(Oc1ccccc1)(Oc1ccccc1)Oc1ccccc1	1	1	4	4	53	28	44	30	64	16
PBE_1+MPS_1	c1ccc(B2OCCCO2)cc1	CS(=O)(=O)c1ccccc1	1	1	4	4	66	37	49	39	63	18
VC_1+TPP_1	O=c1occo1	O=P(Oc1ccccc1)(Oc1ccccc1)Oc1ccccc1	1	1	4	4	73	23	46	33	62	17
PBE_1+DPDMS_1	c1ccc(B2OCCCO2)cc1	CO[Si](OC)(c1ccccc1)c1ccccc1	1	1	4	4	70	25	47	34	62	15
LiDFOB_1+PTSI_1	O=C1O[B-](F)(F)OC1=O.[Li+]	Cc1ccc(S(=O)(=O)N=C=O)cc1	1	1	4	4	66	37	49	39	62	18
VC_1+PTSI_1	O=c1occo1	Cc1ccc(S(=O)(=O)N=C=O)cc1	1	1	4	4	66	37	49	39	62	18
LiBOB_1+PTSI_1	O=C1O[B-]2(OC1=O)OC(=O)C(=O)O2.[Li+]	Cc1ccc(S(=O)(=O)N=C=O)cc1	1	1	4	4	66	37	49	39	62	19
PBE_1+DEPP_1	c1ccc(B2OCCCO2)cc1	CCOP(OCC)c1ccccc1	1	1	4	4	89	28	52	36	59	19
PBE_1+PTSI_1	c1ccc(B2OCCCO2)cc1	Cc1ccc(S(=O)(=O)N=C=O)cc1	1	1	4	4	66	37	49	39	58	20
PES_1+TMSPi_1	O=S1(=O)C=CCO1	C[Si](C)(C)OP(O[Si](C)(C)C)O[Si](C)(C)C	1	1	4	4	72	37	63	28	57	13
PBE_1+TPP_1	c1ccc(B2OCCCO2)cc1	O=P(Oc1ccccc1)(Oc1ccccc1)Oc1ccccc1	1	1	4	4	74	24	49	38	56	20
PES_1+TMSPa_1	O=S1(=O)C=CCO1	C[Si](C)(C)OP(=O)(O[Si](C)(C)C)O[Si](C)(C)C	1	1	4	4	74	36	63	28	56	16
PES_1+MS_1	O=S1(=O)C=CCO1	O=C1CC(=O)O[P-](F)(F)(F)(F)O1.[Li+]	1	1	4	4	82	34	63	28	56	14
PES_1+LDF_1	O=S1(=O)C=CCO1	O=[P-](=O)(F)F.[Li+]	1	1	4	4	86	32	63	28	56	14
PES_1+SA_1	O=S1(=O)C=CCO1	O=C1CCC(=O)O1	1	1	4	4	90	29	63	28	56	13
PES_1+MPS_1	O=S1(=O)C=CCO1	CS(=O)(=O)c1ccccc1	1	1	4	4	66	37	49	39	54	20
PES_1+DPDMS_1	O=S1(=O)C=CCO1	CO[Si](OC)(c1ccccc1)c1ccccc1	1	1	4	4	87	31	55	37	54	18
PES_1+PTSI_1	O=S1(=O)C=CCO1	Cc1ccc(S(=O)(=O)N=C=O)cc1	1	1	4	4	66	37	49	39	53	22
PES_1+TPP_1	O=S1(=O)C=CCO1	O=P(Oc1ccccc1)(Oc1ccccc1)Oc1ccccc1	1	1	4	4	90	29	51	39	53	22
PES_1+DEPP_1	O=S1(=O)C=CCO1	CCOP(OCC)c1ccccc1	1	1	4	4	83	33	53	38	53	22
tVCBO_1+LDF_1	C=CB1OB(C=C)OB(C=C)O1.c1ccncc1	O=[P-](=O)(F)F.[Li+]	1	1	4	4	66	37	53	37	52	22
tVCBO_1+TMSPi_1	C=CB1OB(C=C)OB(C=C)O1.c1ccncc1	C[Si](C)(C)OP(O[Si](C)(C)C)O[Si](C)(C)C	1	1	4	4	66	37	54	37	52	21
tVCBO_1+MS_1	C=CB1OB(C=C)OB(C=C)O1.c1ccncc1	O=C1CC(=O)O[P-](F)(F)(F)(F)O1.[Li+]	1	1	4	4	66	37	54	37	52	22
tVCBO_1+TMSPa_1	C=CB1OB(C=C)OB(C=C)O1.c1ccncc1	C[Si](C)(C)OP(=O)(O[Si](C)(C)C)O[Si](C)(C)C	1	1	4	4	66	37	54	37	52	22
tVCBO_1+SA_1	C=CB1OB(C=C)OB(C=C)O1.c1ccncc1	O=C1CCC(=O)O1	1	1	4	4	66	37	55	37	52	21
LiDFOB_1+DDD_1	O=C1O[B-](F)(F)OC1=O.[Li+]	COC(=O)OCCOC(=O)OC	1	1	4	4	66	37	49	39	51	23
LiDFOB_1+LiBFEP_1	O=C1O[B-](F)(F)OC1=O.[Li+]	O=P([O-])(OCC(F)(F)F)OCC(F)(F)F.[Li+]	1	1	4	4	66	37	49	39	51	23
LiDFOB_1+BA_1	O=C1O[B-](F)(F)OC1=O.[Li+]	CCCC(=O)OC(=O)CCC	1	1	4	4	66	37	49	39	51	23
LiDFOB_1+LiOtC4F9_1	O=C1O[B-](F)(F)OC1=O.[Li+]	[Li+].[O-]C(C(F)(F)F)(C(F)(F)F)C(F)(F)F	1	1	4	4	66	37	49	39	51	23
VC_1+DDD_1	O=c1occo1	COC(=O)OCCOC(=O)OC	1	1	4	4	66	37	49	39	51	23
VC_1+LiBFEP_1	O=c1occo1	O=P([O-])(OCC(F)(F)F)OCC(F)(F)F.[Li+]	1	1	4	4	66	37	49	39	51	23
VC_1+BA_1	O=c1occo1	CCCC(=O)OC(=O)CCC	1	1	4	4	66	37	49	39	51	23
VC_1+LiOtC4F9_1	O=c1occo1	[Li+].[O-]C(C(F)(F)F)(C(F)(F)F)C(F)(F)F	1	1	4	4	66	37	49	39	51	23
PBE_1+DDD_1	c1ccc(B2OCCCO2)cc1	COC(=O)OCCOC(=O)OC	1	1	4	4	66	37	49	39	51	23
PBE_1+LiBFEP_1	c1ccc(B2OCCCO2)cc1	O=P([O-])(OCC(F)(F)F)OCC(F)(F)F.[Li+]	1	1	4	4	66	37	49	39	51	23
PBE_1+BA_1	c1ccc(B2OCCCO2)cc1	CCCC(=O)OC(=O)CCC	1	1	4	4	66	37	49	39	51	23
PBE_1+LiOtC4F9_1	c1ccc(B2OCCCO2)cc1	[Li+].[O-]C(C(F)(F)F)(C(F)(F)F)C(F)(F)F	1	1	4	4	66	37	49	39	51	23
tVCBO_1+DDD_1	C=CB1OB(C=C)OB(C=C)O1.c1ccncc1	COC(=O)OCCOC(=O)OC	1	1	4	4	66	37	49	39	51	23
tVCBO_1+LiBFEP_1	C=CB1OB(C=C)OB(C=C)O1.c1ccncc1	O=P([O-])(OCC(F)(F)F)OCC(F)(F)F.[Li+]	1	1	4	4	66	37	49	39	51	23
tVCBO_1+BA_1	C=CB1OB(C=C)OB(C=C)O1.c1ccncc1	CCCC(=O)OC(=O)CCC	1	1	4	4	66	37	49	39	51	23
tVCBO_1+MPS_1	C=CB1OB(C=C)OB(C=C)O1.c1ccncc1	CS(=O)(=O)c1ccccc1	1	1	4	4	66	37	49	39	51	22
tVCBO_1+LiOtC4F9_1	C=CB1OB(C=C)OB(C=C)O1.c1ccncc1	[Li+].[O-]C(C(F)(F)F)(C(F)(F)F)C(F)(F)F	1	1	4	4	66	37	49	39	51	23
VTA_1+LDF_1	C=Cn1cncn1	O=[P-](=O)(F)F.[Li+]	1	1	4	4	66	37	49	39	51	23
VTA_1+TMSPi_1	C=Cn1cncn1	C[Si](C)(C)OP(O[Si](C)(C)C)O[Si](C)(C)C	1	1	4	4	66	37	49	39	51	23
VTA_1+MS_1	C=Cn1cncn1	O=C1CC(=O)O[P-](F)(F)(F)(F)O1.[Li+]	1	1	4	4	66	37	49	39	51	23
VTA_1+DDD_1	C=Cn1cncn1	COC(=O)OCCOC(=O)OC	1	1	4	4	66	37	49	39	51	23
VTA_1+LiBFEP_1	C=Cn1cncn1	O=P([O-])(OCC(F)(F)F)OCC(F)(F)F.[Li+]	1	1	4	4	66	37	49	39	51	23
VTA_1+BA_1	C=Cn1cncn1	CCCC(=O)OC(=O)CCC	1	1	4	4	66	37	49	39	51	23
VTA_1+PTSI_1	C=Cn1cncn1	Cc1ccc(S(=O)(=O)N=C=O)cc1	1	1	4	4	66	37	49	39	51	23
VTA_1+MPS_1	C=Cn1cncn1	CS(=O)(=O)c1ccccc1	1	1	4	4	66	37	49	39	51	23
VTA_1+LiOtC4F9_1	C=Cn1cncn1	[Li+].[O-]C(C(F)(F)F)(C(F)(F)F)C(F)(F)F	1	1	4	4	66	37	49	39	51	23
VTA_1+DEPP_1	C=Cn1cncn1	CCOP(OCC)c1ccccc1	1	1	4	4	66	37	49	39	51	23
VTA_1+DPDMS_1	C=Cn1cncn1	CO[Si](OC)(c1ccccc1)c1ccccc1	1	1	4	4	66	37	49	39	51	23
VTA_1+SA_1	C=Cn1cncn1	O=C1CCC(=O)O1	1	1	4	4	66	37	49	39	51	23
VTA_1+TPP_1	C=Cn1cncn1	O=P(Oc1ccccc1)(Oc1ccccc1)Oc1ccccc1	1	1	4	4	66	37	49	39	51	23
VTA_1+TMSPa_1	C=Cn1cncn1	C[Si](C)(C)OP(=O)(O[Si](C)(C)C)O[Si](C)(C)C	1	1	4	4	66	37	49	39	51	23
Vim_1+LDF_1	C=Cn1ccnc1	O=[P-](=O)(F)F.[Li+]	1	1	4	4	66	37	49	39	51	23
Vim_1+TMSPi_1	C=Cn1ccnc1	C[Si](C)(C)OP(O[Si](C)(C)C)O[Si](C)(C)C	1	1	4	4	66	37	49	39	51	23
Vim_1+MS_1	C=Cn1ccnc1	O=C1CC(=O)O[P-](F)(F)(F)(F)O1.[Li+]	1	1	4	4	66	37	49	39	51	23
Vim_1+DDD_1	C=Cn1ccnc1	COC(=O)OCCOC(=O)OC	1	1	4	4	66	37	49	39	51	23
Vim_1+LiBFEP_1	C=Cn1ccnc1	O=P([O-])(OCC(F)(F)F)OCC(F)(F)F.[Li+]	1	1	4	4	66	37	49	39	51	23
Vim_1+BA_1	C=Cn1ccnc1	CCCC(=O)OC(=O)CCC	1	1	4	4	66	37	49	39	51	23
Vim_1+PTSI_1	C=Cn1ccnc1	Cc1ccc(S(=O)(=O)N=C=O)cc1	1	1	4	4	66	37	49	39	51	23
Vim_1+MPS_1	C=Cn1ccnc1	CS(=O)(=O)c1ccccc1	1	1	4	4	66	37	49	39	51	23
Vim_1+LiOtC4F9_1	C=Cn1ccnc1	[Li+].[O-]C(C(F)(F)F)(C(F)(F)F)C(F)(F)F	1	1	4	4	66	37	49	39	51	23
Vim_1+DEPP_1	C=Cn1ccnc1	CCOP(OCC)c1ccccc1	1	1	4	4	66	37	49	39	51	23
Vim_1+DPDMS_1	C=Cn1ccnc1	CO[Si](OC)(c1ccccc1)c1ccccc1	1	1	4	4	66	37	49	39	51	23
Vim_1+SA_1	C=Cn1ccnc1	O=C1CCC(=O)O1	1	1	4	4	66	37	49	39	51	23
Vim_1+TPP_1	C=Cn1ccnc1	O=P(Oc1ccccc1)(Oc1ccccc1)Oc1ccccc1	1	1	4	4	66	37	49	39	51	23
Vim_1+TMSPa_1	C=Cn1ccnc1	C[Si](C)(C)OP(=O)(O[Si](C)(C)C)O[Si](C)(C)C	1	1	4	4	66	37	49	39	51	23
LiBOB_1+DDD_1	O=C1O[B-]2(OC1=O)OC(=O)C(=O)O2.[Li+]	COC(=O)OCCOC(=O)OC	1	1	4	4	66	37	49	39	51	23
LiBOB_1+LiBFEP_1	O=C1O[B-]2(OC1=O)OC(=O)C(=O)O2.[Li+]	O=P([O-])(OCC(F)(F)F)OCC(F)(F)F.[Li+]	1	1	4	4	66	37	49	39	51	23
LiBOB_1+BA_1	O=C1O[B-]2(OC1=O)OC(=O)C(=O)O2.[Li+]	CCCC(=O)OC(=O)CCC	1	1	4	4	66	37	49	39	51	23
LiBOB_1+LiOtC4F9_1	O=C1O[B-]2(OC1=O)OC(=O)C(=O)O2.[Li+]	[Li+].[O-]C(C(F)(F)F)(C(F)(F)F)C(F)(F)F	1	1	4	4	66	37	49	39	51	23
Li2C2O4_1+LDF_1	O=C([O-])C(=O)[O-].[Li+].[Li+]	O=[P-](=O)(F)F.[Li+]	1	1	4	4	66	37	49	39	51	23
Li2C2O4_1+TMSPi_1	O=C([O-])C(=O)[O-].[Li+].[Li+]	C[Si](C)(C)OP(O[Si](C)(C)C)O[Si](C)(C)C	1	1	4	4	66	37	49	39	51	23
Li2C2O4_1+MS_1	O=C([O-])C(=O)[O-].[Li+].[Li+]	O=C1CC(=O)O[P-](F)(F)(F)(F)O1.[Li+]	1	1	4	4	66	37	49	39	51	23
Li2C2O4_1+DDD_1	O=C([O-])C(=O)[O-].[Li+].[Li+]	COC(=O)OCCOC(=O)OC	1	1	4	4	66	37	49	39	51	23
Li2C2O4_1+LiBFEP_1	O=C([O-])C(=O)[O-].[Li+].[Li+]	O=P([O-])(OCC(F)(F)F)OCC(F)(F)F.[Li+]	1	1	4	4	66	37	49	39	51	23
Li2C2O4_1+BA_1	O=C([O-])C(=O)[O-].[Li+].[Li+]	CCCC(=O)OC(=O)CCC	1	1	4	4	66	37	49	39	51	23
Li2C2O4_1+PTSI_1	O=C([O-])C(=O)[O-].[Li+].[Li+]	Cc1ccc(S(=O)(=O)N=C=O)cc1	1	1	4	4	66	37	49	39	51	23
Li2C2O4_1+MPS_1	O=C([O-])C(=O)[O-].[Li+].[Li+]	CS(=O)(=O)c1ccccc1	1	1	4	4	66	37	49	39	51	23
Li2C2O4_1+LiOtC4F9_1	O=C([O-])C(=O)[O-].[Li+].[Li+]	[Li+].[O-]C(C(F)(F)F)(C(F)(F)F)C(F)(F)F	1	1	4	4	66	37	49	39	51	23
Li2C2O4_1+DEPP_1	O=C([O-])C(=O)[O-].[Li+].[Li+]	CCOP(OCC)c1ccccc1	1	1	4	4	66	37	49	39	51	23
Li2C2O4_1+DPDMS_1	O=C([O-])C(=O)[O-].[Li+].[Li+]	CO[Si](OC)(c1ccccc1)c1ccccc1	1	1	4	4	66	37	49	39	51	23
Li2C2O4_1+SA_1	O=C([O-])C(=O)[O-].[Li+].[Li+]	O=C1CCC(=O)O1	1	1	4	4	66	37	49	39	51	23
Li2C2O4_1+TPP_1	O=C([O-])C(=O)[O-].[Li+].[Li+]	O=P(Oc1ccccc1)(Oc1ccccc1)Oc1ccccc1	1	1	4	4	66	37	49	39	51	23
Li2C2O4_1+TMSPa_1	O=C([O-])C(=O)[O-].[Li+].[Li+]	C[Si](C)(C)OP(=O)(O[Si](C)(C)C)O[Si](C)(C)C	1	1	4	4	66	37	49	39	51	23
ADM_1+LDF_1	C=C[B-]12OC(=O)C[N+]1(C)CC(=O)O2	O=[P-](=O)(F)F.[Li+]	1	1	4	4	66	37	49	39	51	23
ADM_1+TMSPi_1	C=C[B-]12OC(=O)C[N+]1(C)CC(=O)O2	C[Si](C)(C)OP(O[Si](C)(C)C)O[Si](C)(C)C	1	1	4	4	66	37	49	39	51	23
ADM_1+MS_1	C=C[B-]12OC(=O)C[N+]1(C)CC(=O)O2	O=C1CC(=O)O[P-](F)(F)(F)(F)O1.[Li+]	1	1	4	4	66	37	49	39	51	23
ADM_1+DDD_1	C=C[B-]12OC(=O)C[N+]1(C)CC(=O)O2	COC(=O)OCCOC(=O)OC	1	1	4	4	66	37	49	39	51	23
ADM_1+LiBFEP_1	C=C[B-]12OC(=O)C[N+]1(C)CC(=O)O2	O=P([O-])(OCC(F)(F)F)OCC(F)(F)F.[Li+]	1	1	4	4	66	37	49	39	51	23
ADM_1+BA_1	C=C[B-]12OC(=O)C[N+]1(C)CC(=O)O2	CCCC(=O)OC(=O)CCC	1	1	4	4	66	37	49	39	51	23
ADM_1+PTSI_1	C=C[B-]12OC(=O)C[N+]1(C)CC(=O)O2	Cc1ccc(S(=O)(=O)N=C=O)cc1	1	1	4	4	66	37	49	39	51	23
ADM_1+MPS_1	C=C[B-]12OC(=O)C[N+]1(C)CC(=O)O2	CS(=O)(=O)c1ccccc1	1	1	4	4	66	37	49	39	51	23
ADM_1+LiOtC4F9_1	C=C[B-]12OC(=O)C[N+]1(C)CC(=O)O2	[Li+].[O-]C(C(F)(F)F)(C(F)(F)F)C(F)(F)F	1	1	4	4	66	37	49	39	51	23
ADM_1+DEPP_1	C=C[B-]12OC(=O)C[N+]1(C)CC(=O)O2	CCOP(OCC)c1ccccc1	1	1	4	4	66	37	49	39	51	23
ADM_1+DPDMS_1	C=C[B-]12OC(=O)C[N+]1(C)CC(=O)O2	CO[Si](OC)(c1ccccc1)c1ccccc1	1	1	4	4	66	37	49	39	51	23
ADM_1+SA_1	C=C[B-]12OC(=O)C[N+]1(C)CC(=O)O2	O=C1CCC(=O)O1	1	1	4	4	66	37	49	39	51	23
ADM_1+TPP_1	C=C[B-]12OC(=O)C[N+]1(C)CC(=O)O2	O=P(Oc1ccccc1)(Oc1ccccc1)Oc1ccccc1	1	1	4	4	66	37	49	39	51	23
ADM_1+TMSPa_1	C=C[B-]12OC(=O)C[N+]1(C)CC(=O)O2	C[Si](C)(C)OP(=O)(O[Si](C)(C)C)O[Si](C)(C)C	1	1	4	4	66	37	49	39	51	23
PES_1+DDD_1	O=S1(=O)C=CCO1	COC(=O)OCCOC(=O)OC	1	1	4	4	66	37	49	39	51	23
PES_1+LiBFEP_1	O=S1(=O)C=CCO1	O=P([O-])(OCC(F)(F)F)OCC(F)(F)F.[Li+]	1	1	4	4	66	37	49	39	51	23
PES_1+BA_1	O=S1(=O)C=CCO1	CCCC(=O)OC(=O)CCC	1	1	4	4	66	37	49	39	51	23
PES_1+LiOtC4F9_1	O=S1(=O)C=CCO1	[Li+].[O-]C(C(F)(F)F)(C(F)(F)F)C(F)(F)F	1	1	4	4	66	37	49	39	51	23
tVCBO_1+PTSI_1	C=CB1OB(C=C)OB(C=C)O1.c1ccncc1	Cc1ccc(S(=O)(=O)N=C=O)cc1	1	1	4	4	66	37	49	39	50	23
tVCBO_1+TPP_1	C=CB1OB(C=C)OB(C=C)O1.c1ccncc1	O=P(Oc1ccccc1)(Oc1ccccc1)Oc1ccccc1	1	1	4	4	66	37	52	39	50	23
tVCBO_1+DPDMS_1	C=CB1OB(C=C)OB(C=C)O1.c1ccncc1	CO[Si](OC)(c1ccccc1)c1ccccc1	1	1	4	4	66	37	55	38	50	22
tVCBO_1+DEPP_1	C=CB1OB(C=C)OB(C=C)O1.c1ccncc1	CCOP(OCC)c1ccccc1	1	1	4	4	66	37	57	37	47	22
